# Supplementary material for: Synthesis of poly(spirosilabifluorene) copolymers and their improved stability in blue emitting polymer LEDs over non-spiro analogs
Source: Royal Society of Chemistry journal article supplement (doi:10.1039/c4py01418a), 2015-01-01
Supplement: c4py01418a1.pdf [file c4py01418a1.pdf]

## Supporting Information

# Synthesis of Poly(Spirobisilafluorenes) and Their Improved Stability in Blue Emitting Polymer LEDs over Non-Spiro Analogs

*Jeffrey J. McDowell, Dong Gao, Dwight S. Seferos, Geoffrey Ozin*

Contents:

### **Section 1:** $^1\text{H}/^{13}\text{C}$ NMR of Intermediate Compounds

S1.1.0 – 4,4'-dibromo-3,3'-dimethoxy-1,1'-biphenyl (2)  $^1\text{H}$ -NMR

S1.1.1 – 4,4'-dibromo-3,3'-dimethoxy-1,1'-biphenyl (2)  $^{13}\text{C}$ -NMR

S1.2.0 – 4,4'-dibromo-2,2'-diiodo-5,5'-dimethoxy-1,1'-biphenyl (3)  $^1\text{H}$ -NMR

S1.2.1 – 4,4'-dibromo-2,2'-diiodo-5,5'-dimethoxy-1,1'-biphenyl (3)  $^{13}\text{C}$ -NMR

S1.3.0 – o-dihexyloxybenzene (5)  $^1\text{H}$ -NMR

S1.3.1 – o-dihexyloxybenzene (5)  $^{13}\text{C}$ -NMR

S1.4.0 – 1-iodo-3,4-dihexyloxybenzene (6)  $^1\text{H}$ -NMR

S1.4.1 – 1-iodo-3,4-dihexyloxybenzene (6)  $^{13}\text{C}$ -NMR

S1.5.0 – 2,2'-diiodo-4,4',5,5'-tetrahexyloxy-1,1'-biphenyl (7)  $^1\text{H}$ -NMR

S1.5.1 – 2,2'-diiodo-4,4',5,5'-tetrahexyloxy-1,1'-biphenyl (7)  $^{13}\text{C}$ -NMR

S1.6.0 – 2,3,6,7-tetrahexyloxy-9,9-dichlorosilafluorene (9)  $^1\text{H}$ -NMR

S1.6.1 – 2,3,6,7-tetrahexyloxy-9,9-dichlorosilafluorene (9)  $^{13}\text{C}$ -NMR

S1.6.2 – 2,3,6,7-tetrahexyloxy-9,9-dichlorosilafluorene (9)  $^{29}\text{Si}$ -NMR

S1.7.0 – 2,7-dibromo-3,6-dimethoxy-2',3',6',7'-tetrahexyloxy-9,9-spiro-9-silabifluorene (10)  
 $^1\text{H}$ -NMR

S1.7.1 – 2,7-dibromo-3,6-dimethoxy-2',3',6',7'-tetrahexyloxy-9,9-spiro-9-silabifluorene (10)  
 $^{13}\text{C}$ -NMR

S1.7.2 – **2.7-dibromo-3.6-dimethoxy-2',3',6',7'-tetrahexyloxy-9,9-spiro-9-silabifluorene (10)**  
<sup>29</sup>Si-NMR

S1.8.0 – **2.7-dibromo-3.6-dimethoxy-9,9-dihexylsilabifluorene (11)** <sup>1</sup>H-NMR

S1.8.1 – **2.7-dibromo-3.6-dimethoxy-9,9-dihexylsilabifluorene (11)** <sup>13</sup>C-NMR

S1.8.2 – **2.7-dibromo-3.6-dimethoxy-9,9-dihexylsilabifluorene (11)** <sup>29</sup>Si-NMR

S1.8.3- **Poly(3,6-dimethoxy-9,9'-dihexylsilafuorene) (PDHSF)** <sup>1</sup>H-NMR

S1.9.0 – **Poly(3,6-dimethoxy-9.9'-dihexylsilafuorene-co-3.6-dimethoxy-2',3',6',7'-tetrahexyloxy-9,9-spiro-9-silabifluorene) (PDHSF-co-PHSSF) (13)** <sup>1</sup>H-NMR

S1.9.1 – **Poly(3,6-dimethoxy-9.9'-dihexylsilafuorene-co-3.6-dimethoxy-2',3',6',7'-tetrahexyloxy-9,9-spiro-9-silabifluorene) (PDHSF-co-PHSSF) (13)** <sup>29</sup>Si HMCB NMR

S1.9.2 – **Poly(3,6-dimethoxy-9.9'-dihexylsilafuorene-co-3.6-dimethoxy-2',3',6',7'-tetrahexyloxy-9,9-spiro-9-silabifluorene) (PDHSF-co-PHSSF) (13)** <sup>29</sup>Si Ratio

## **Section2:** GPC Data:

S2.1.0 – **Poly(3,6-dimethoxy-9.9'-dihexylsilafuorene-co-3.6-dimethoxy-2',3',6',7'-tetrahexyloxy-9,9-spiro-9-silabifluorene) (PDHSF-co-PHSSF) (13)**- GPC (THF Eluent, 35°C Column Temp., PS Standards):

S2.2.0 – **Poly(3,6-dimethoxy-9.9'-dihexylsilafuorene) (PDHSF)**- GPC (THF Eluent, 35°C Column Temp., PS Standards): PC Data:

## **Section3:** Electrochemistry

S3.1.0 – CV of **Poly(3,6-dimethoxy-9.9'-dihexylsilafuorene-co-3.6-dimethoxy-2',3',6',7'-tetrahexyloxy-9,9-spiro-9-silabifluorene) (PDHSF-co-PHSSF) (13)**

---

## Section 1: $^1\text{H}/^{13}\text{C}$ NMR of Intermediate Compounds

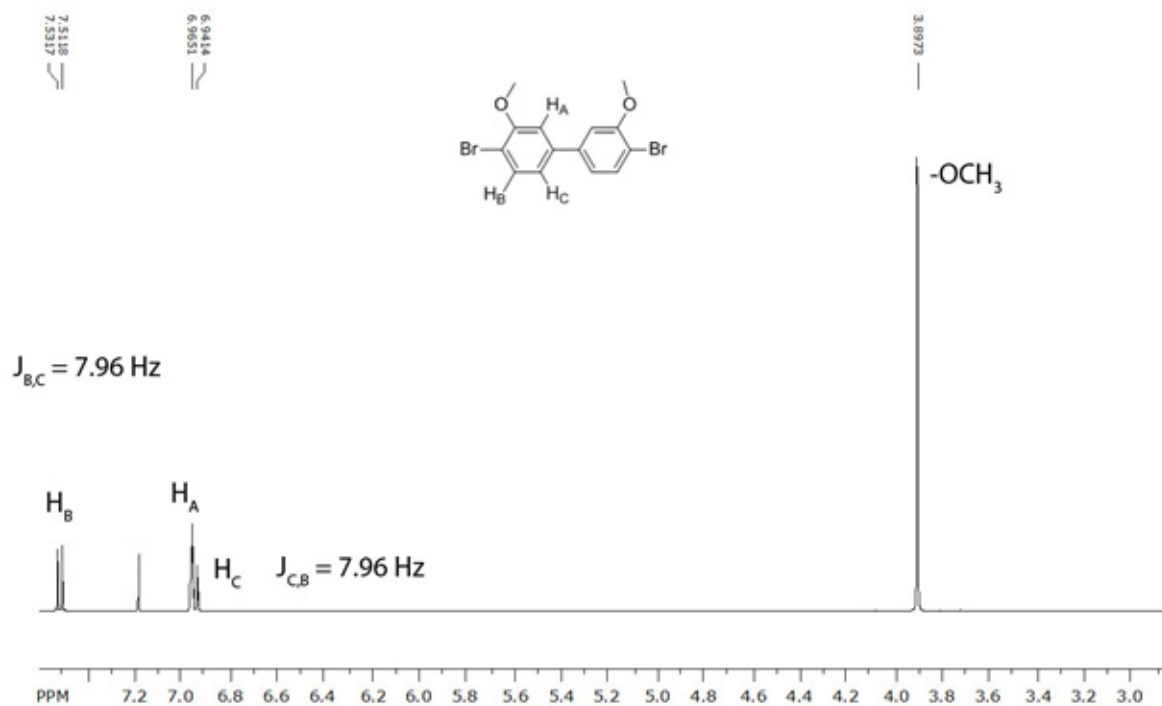

### S1.1.0 –4,4'-dibromo-3,3'-dimethoxy-1,1'-biphenyl (2) $^1\text{H}$ -NMR

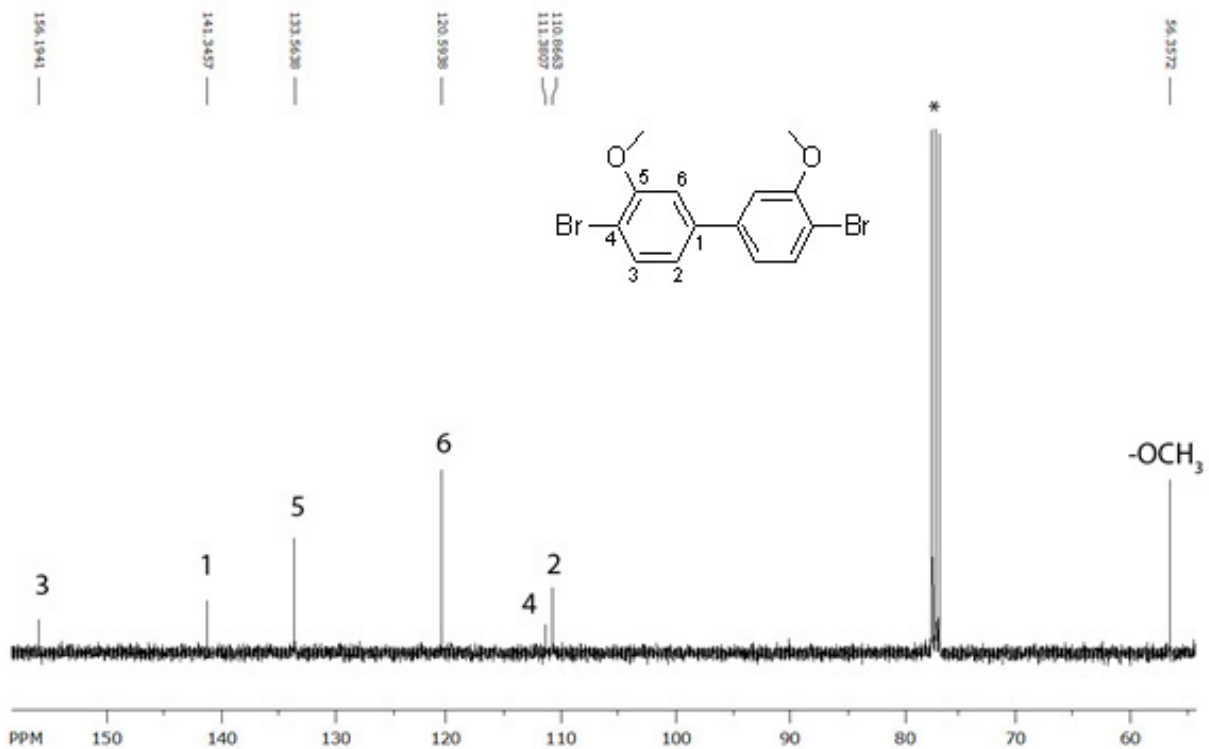

### S1.1.1 –4,4'-dibromo-3,3'-dimethoxy-1,1'-biphenyl (2) $^{13}\text{C}$ -NMR

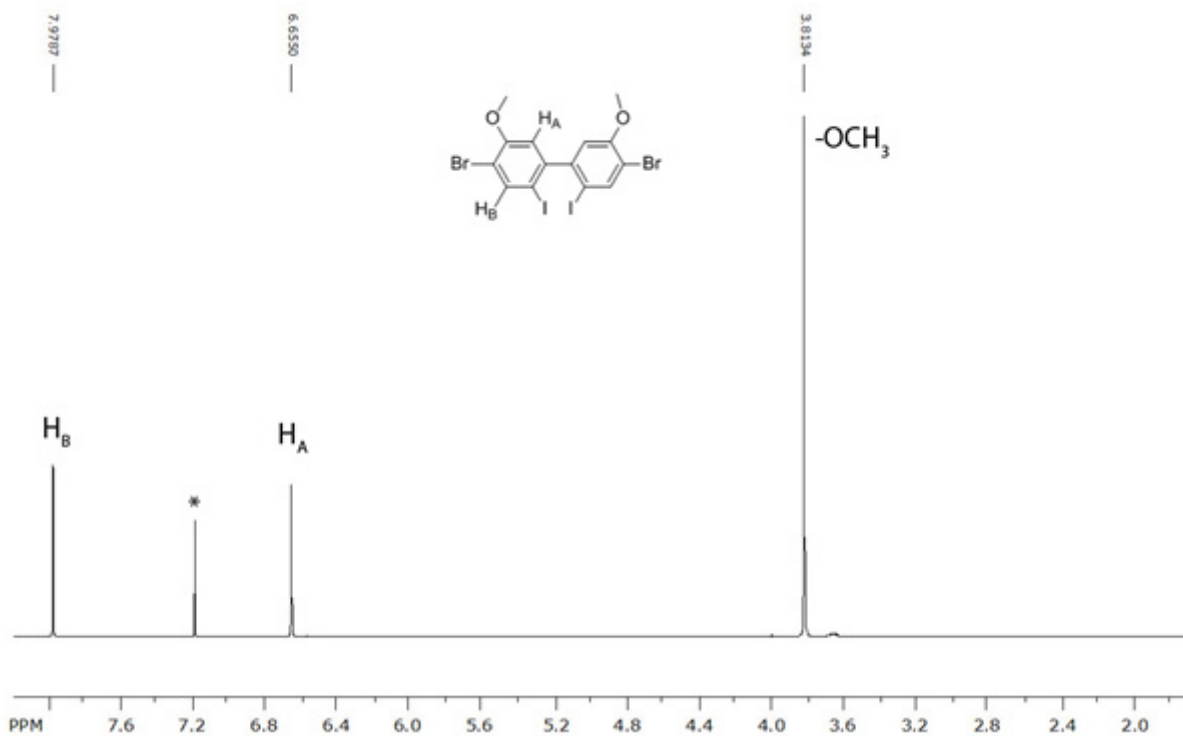

S1.2.0 – 4,4'-dibromo-2,2'-diiodo-5,5'-dimethoxy-1,1'-biphenyl (3) <sup>1</sup>H-NMR

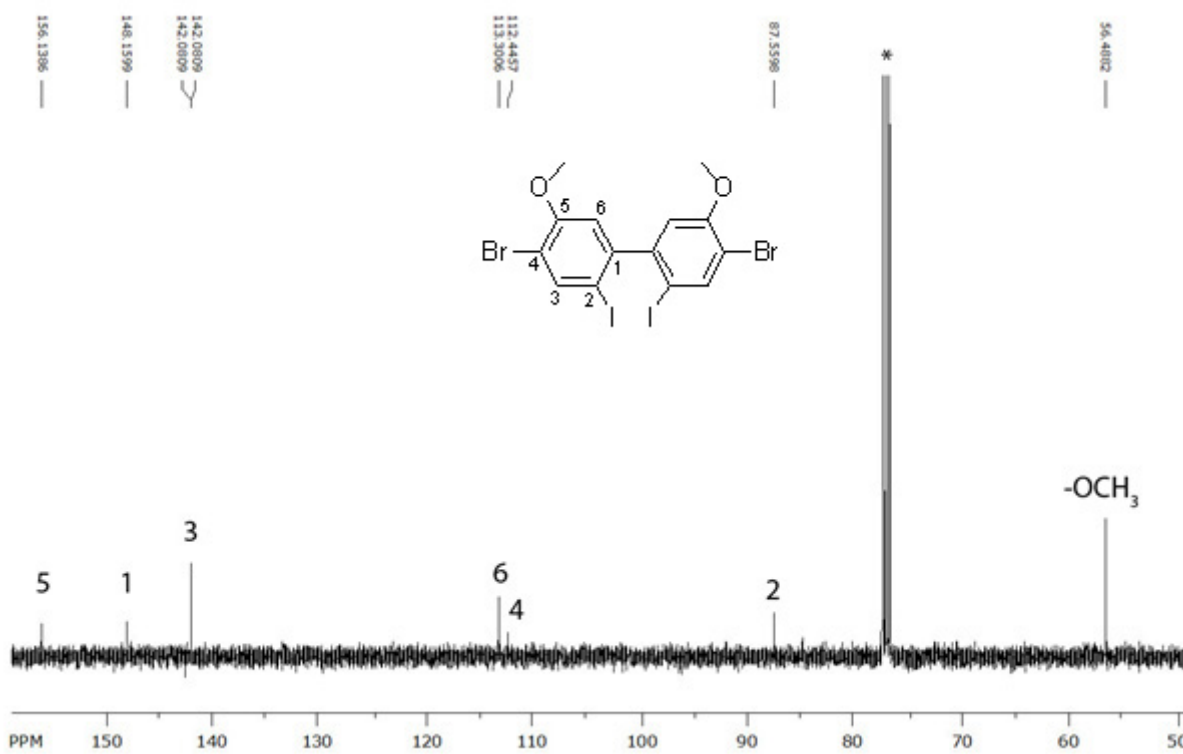

S1.2.1 – 4,4'-dibromo-2,2'-diiodo-5,5'-dimethoxy-1,1'-biphenyl (3) <sup>13</sup>C-NMR

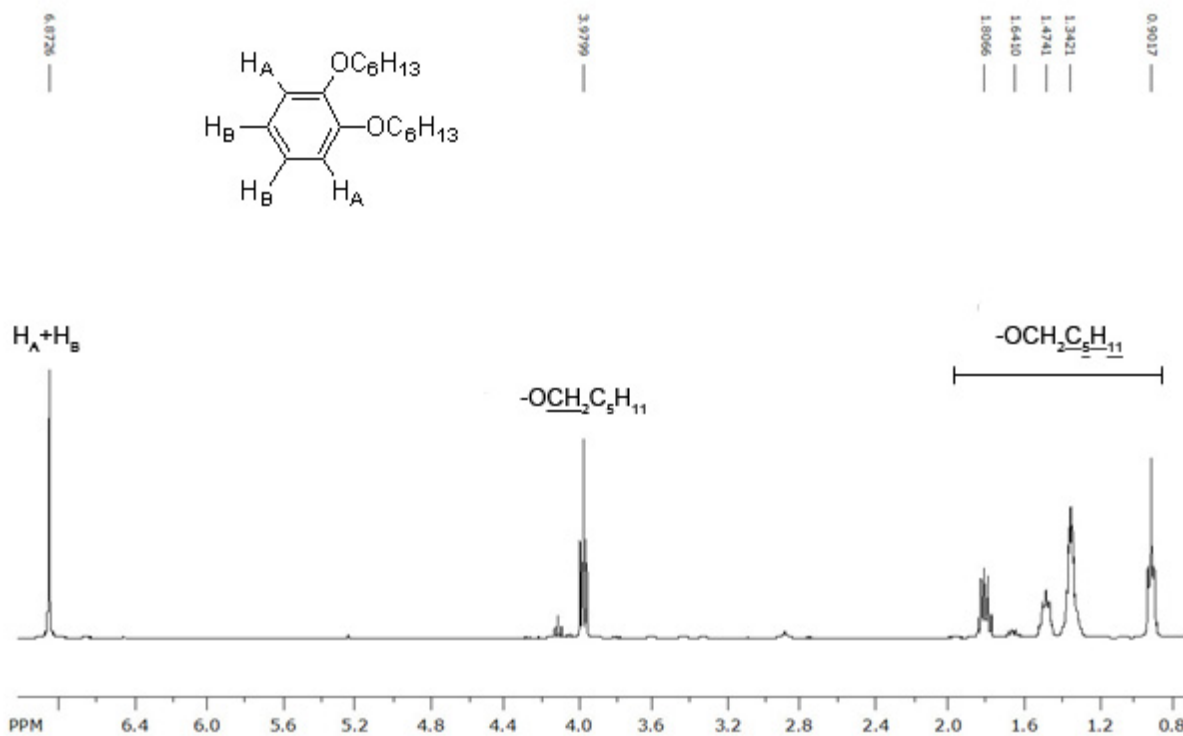

### S1.3.0 – o-dihexyloxybenzene (5) <sup>1</sup>H-NMR

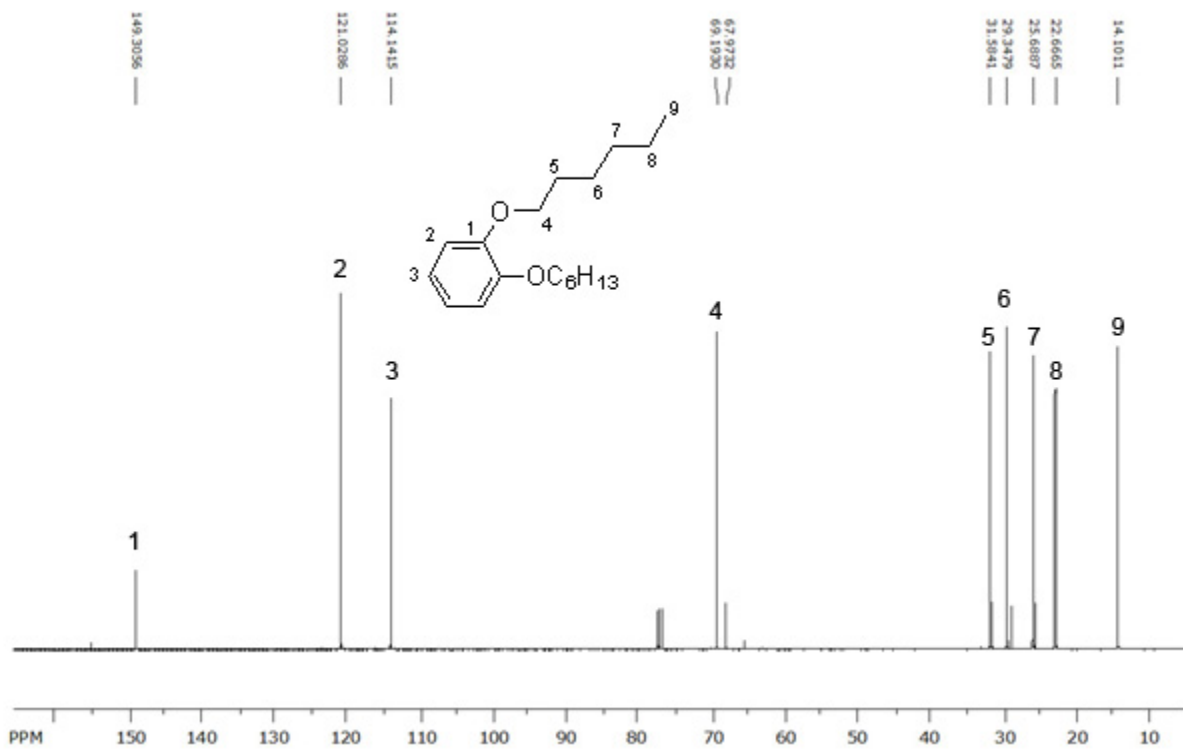

### S1.3.1 – o-dihexyloxybenzene (5) <sup>13</sup>C-NMR

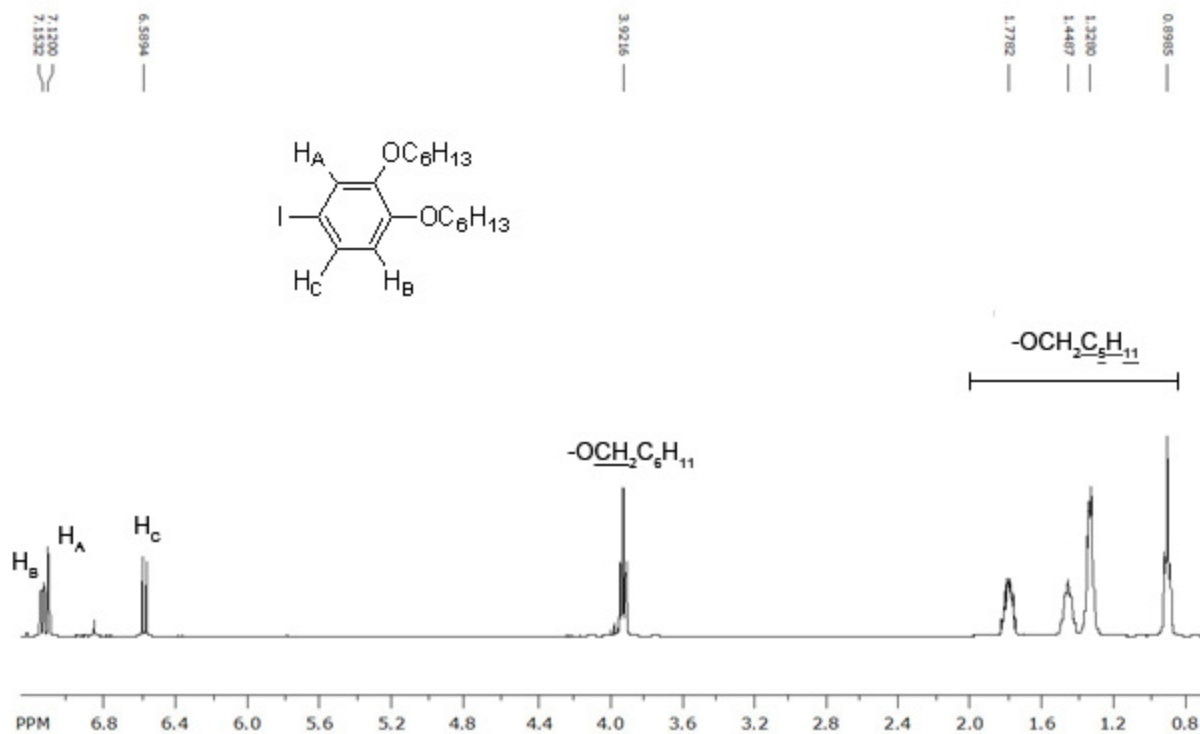

#### S1.4.0 – 1-iodo-3,4-dihexyloxybenzene (6) $^1H$ -NMR

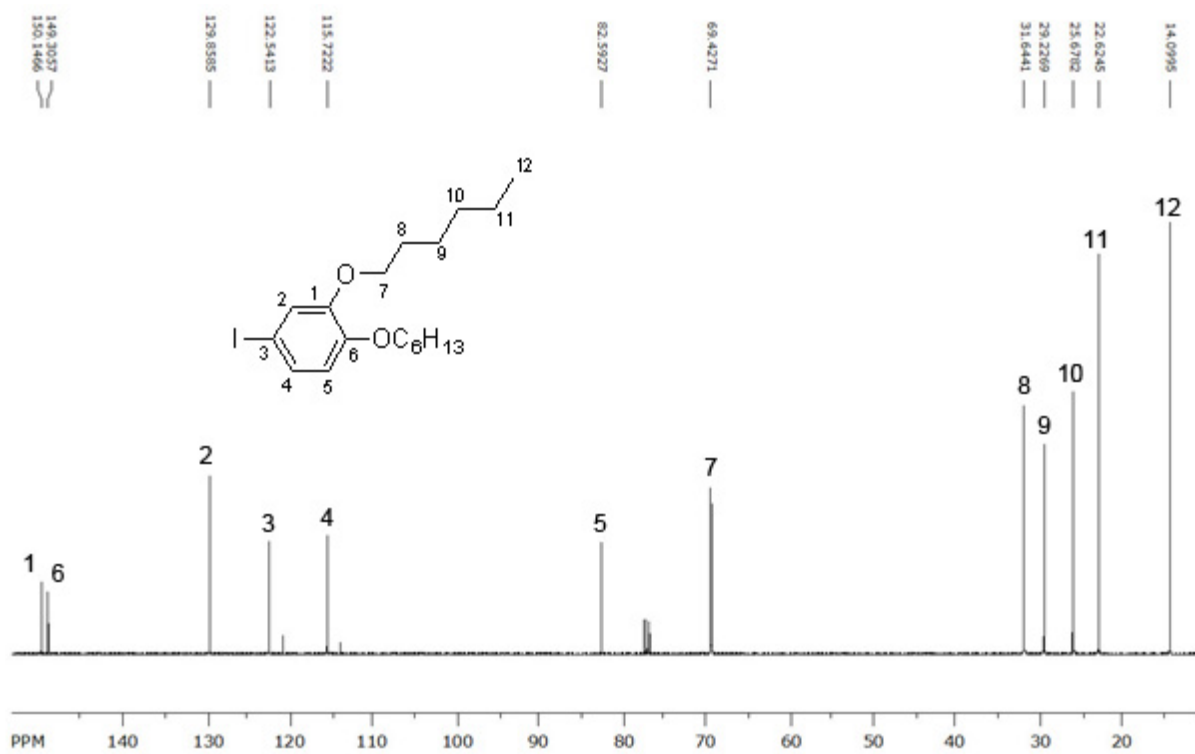

#### S1.4.1 – 1-iodo-3,4-dihexyloxybenzene (6) $^{13}C$ -NMR

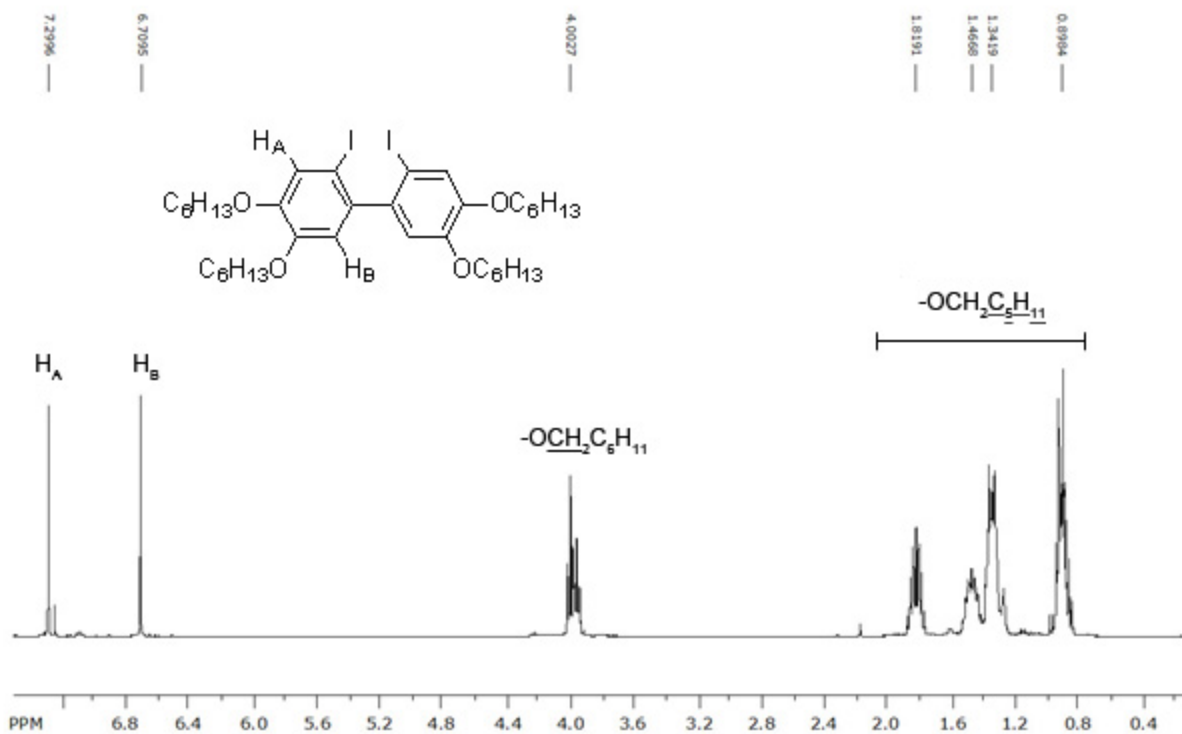

S1.5.0 – 2,2'-diiodo-4,4',5,5'-tetrahexyloxy-1,1'-biphenyl (7)  $^1H$ -NMR

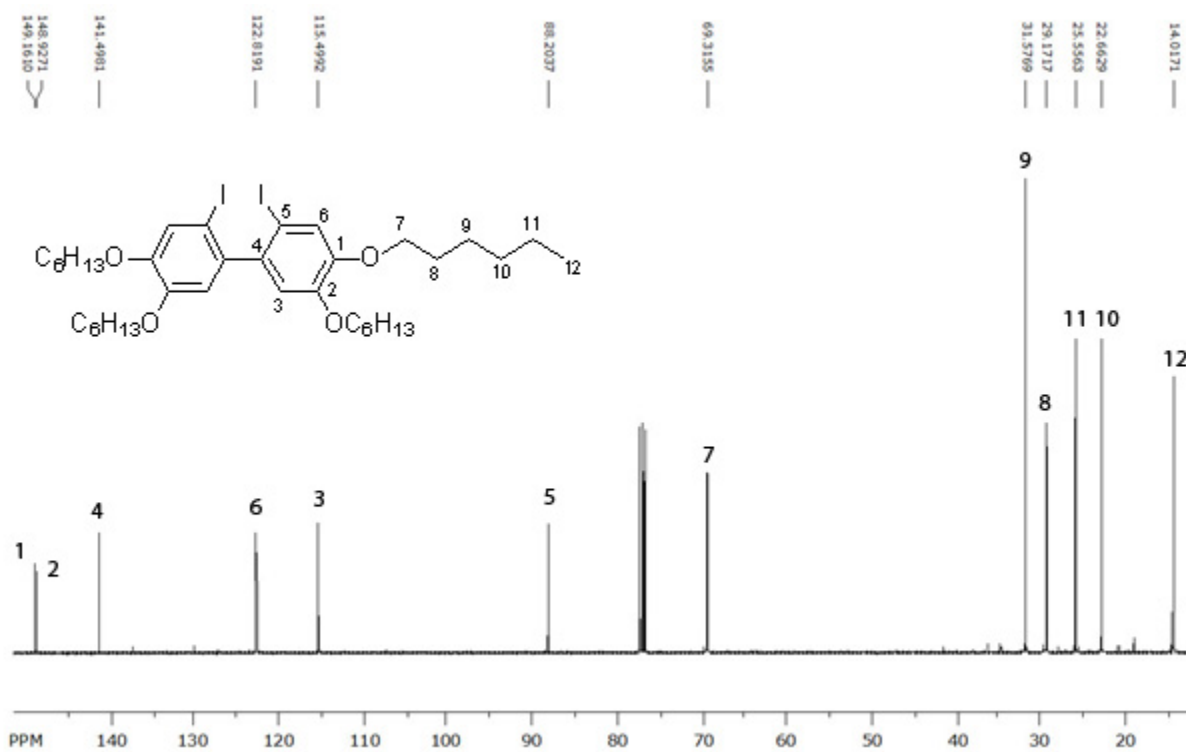

S1.5.1 – 2,2'-diiodo-4,4',5,5'-tetrahexyloxy-1,1'-biphenyl (7)  $^{13}C$ -NMR

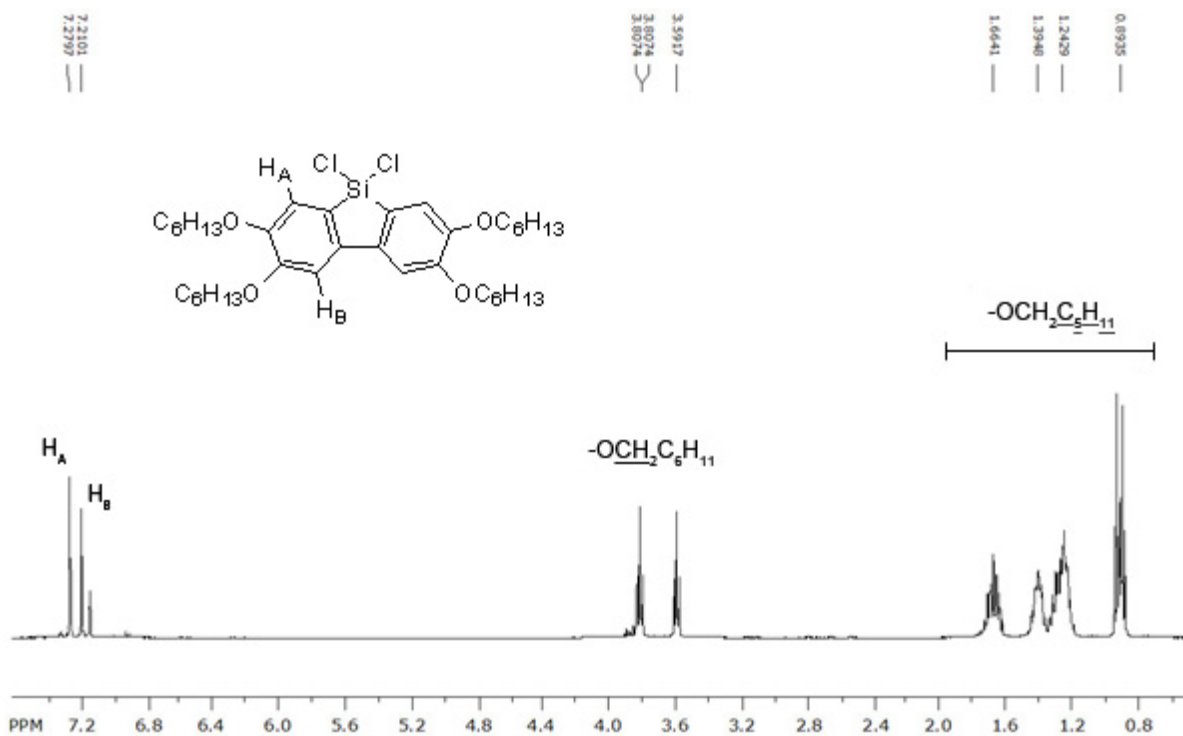

S1.6.0 – 2,3,6,7-tetrahexyloxy-9,9-dichlorosilafluorene (9)  $^1H$ -NMR

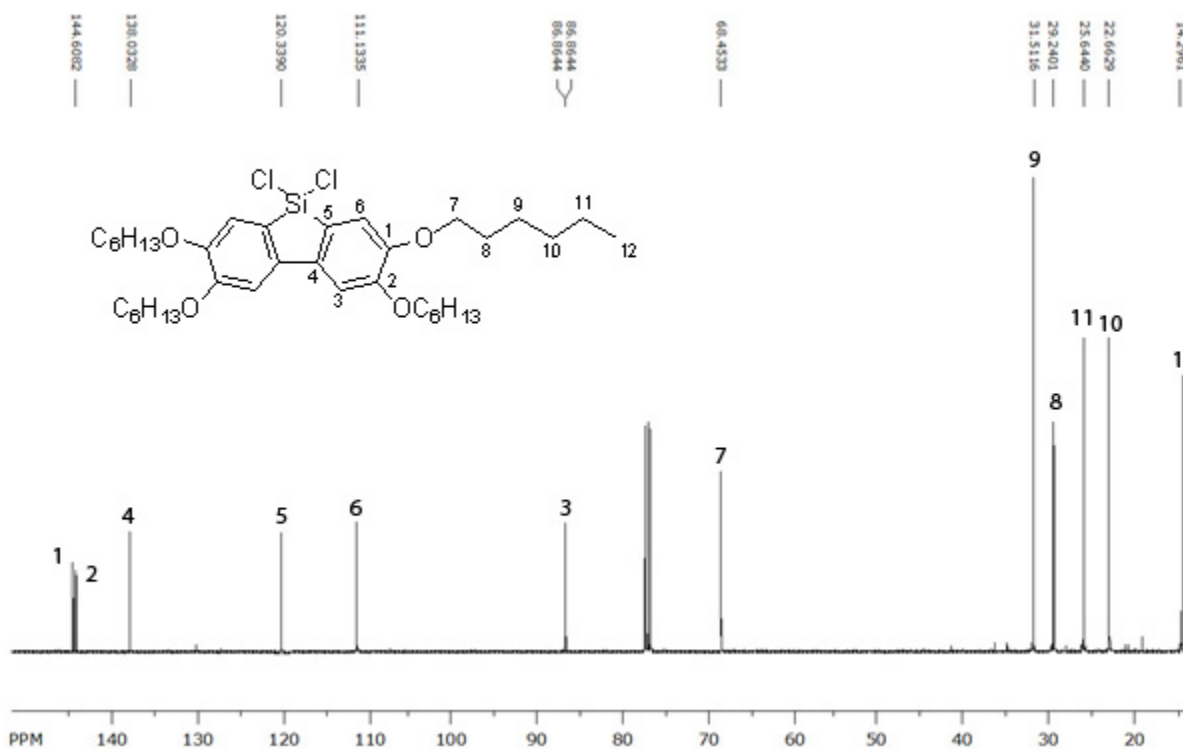

S1.6.1 – 2,3,6,7-tetrahexyloxy-9,9-dichlorosilafluorene (9)  $^{13}C$ -NMR



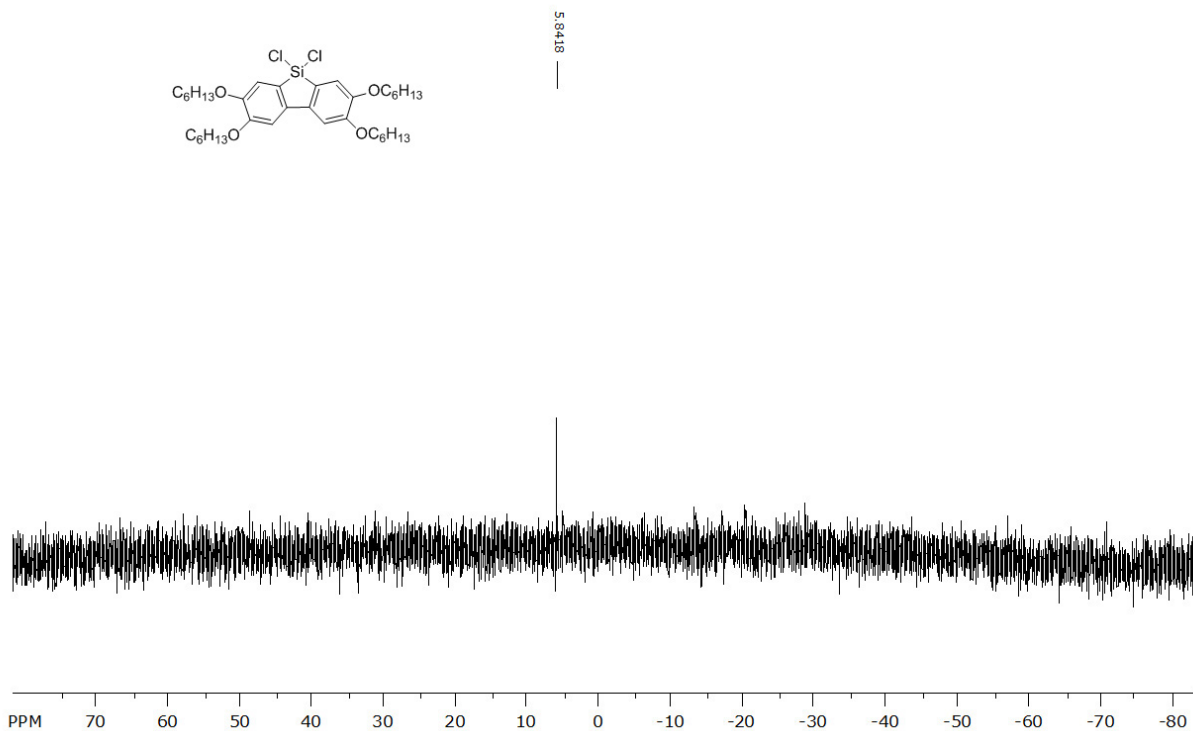

S1.6.2 – 2,3,6,7-tetrahexyloxy-9,9-dichlorosilabfluorene (9)  $^{29}\text{Si-NMR}$

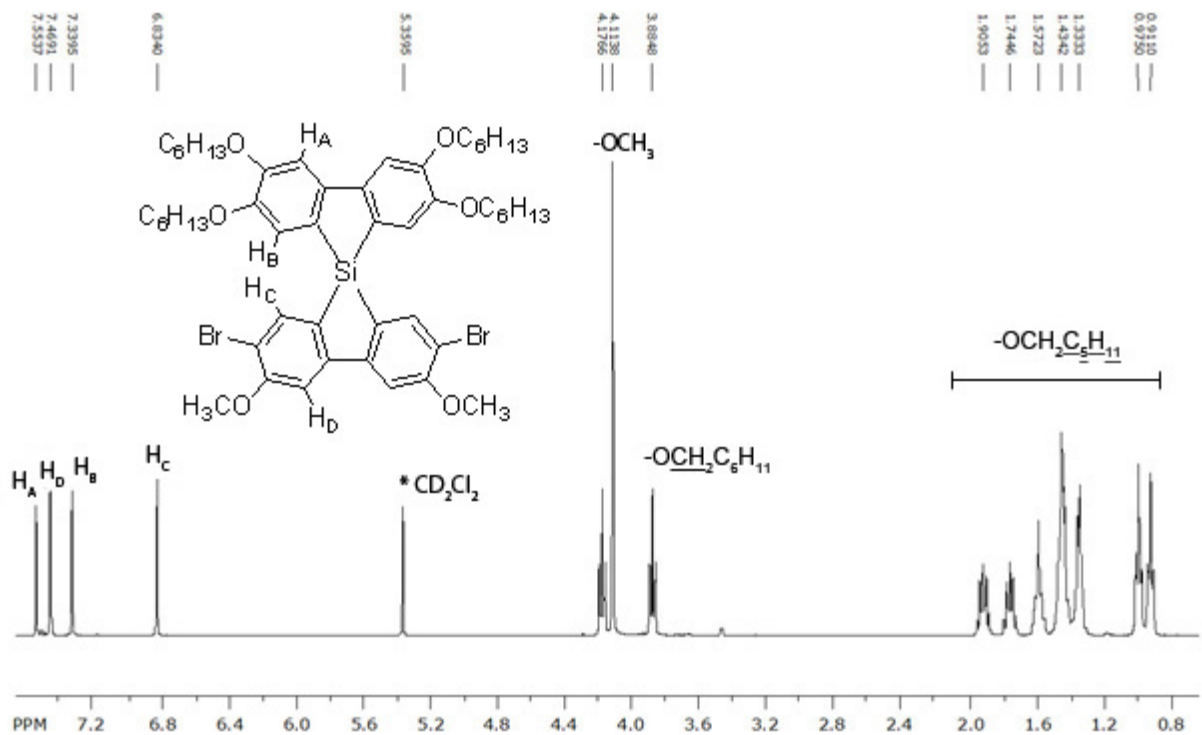

S1.7.0 – 2,7-dibromo-3,6-dimethoxy-2',3',6',7'-tetrahexyloxy-9,9-spiro-9-silabifluorene (10)  $^1\text{H-NMR}$

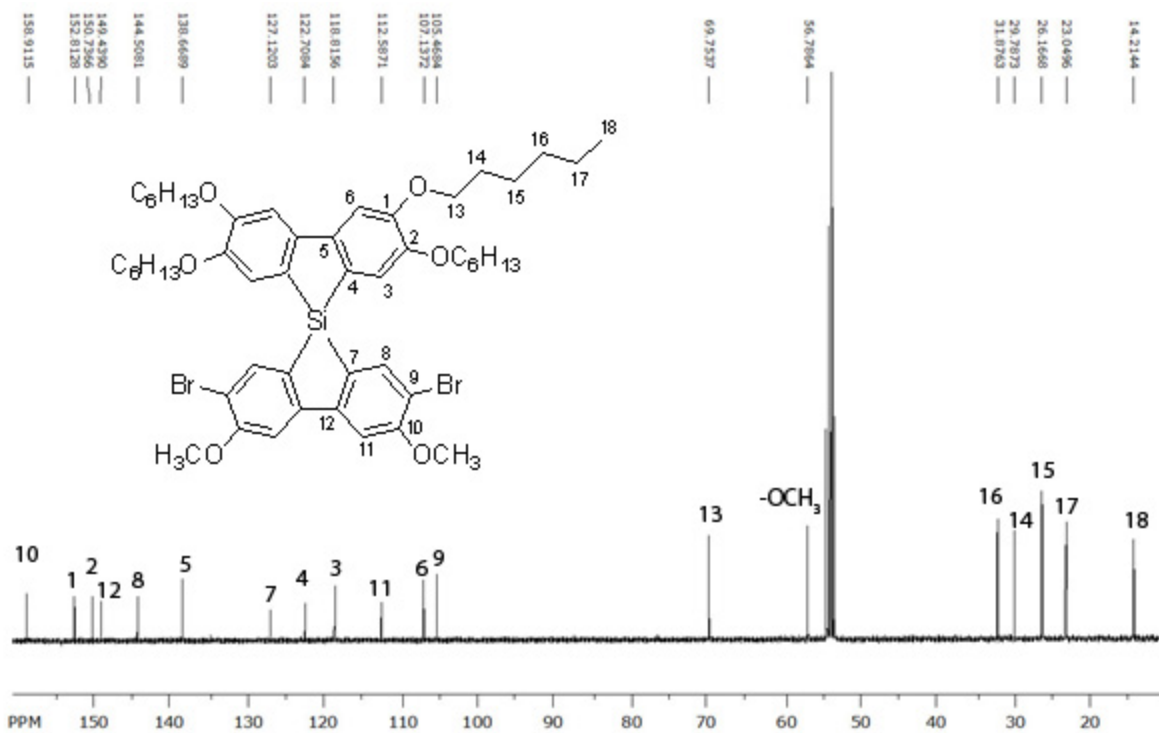

S1.7.1 – 2,7-dibromo-3,6-dimethoxy-2',3',6',7'-tetrahexyloxy-9,9-spiro-9-silabifluorene (10)  
<sup>13</sup>C-NMR

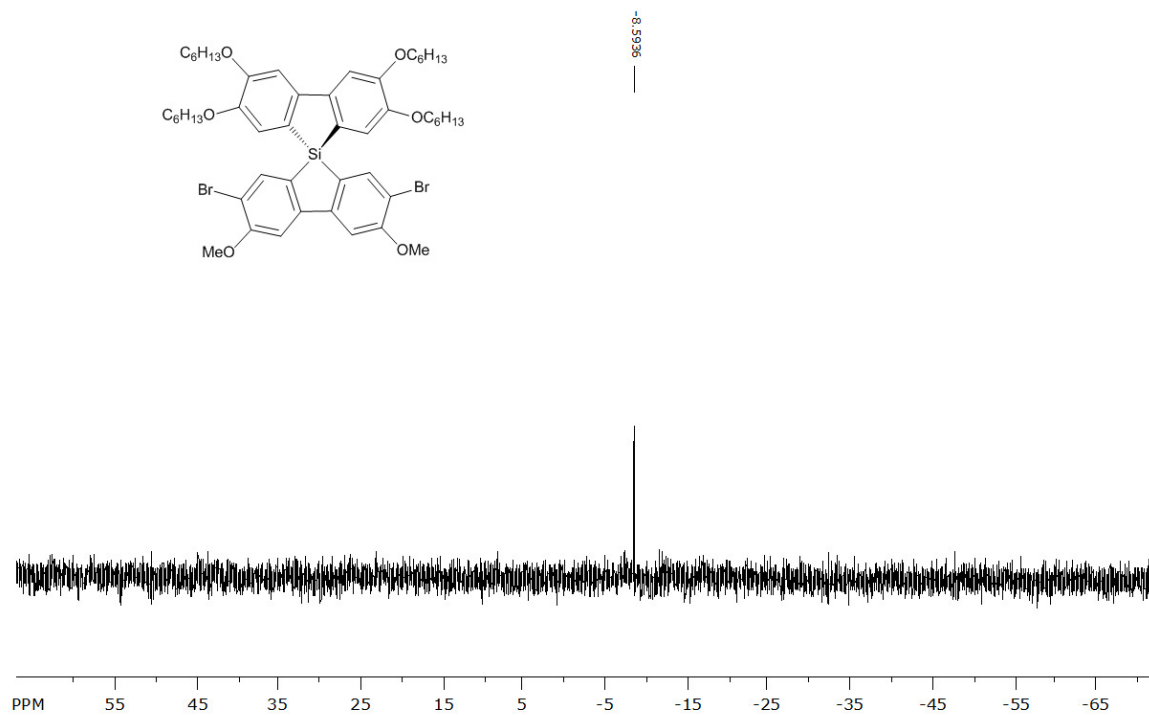

S1.7.2 – 2,7-dibromo-3,6-dimethoxy-2',3',6',7'-tetrahexyloxy-9,9-spiro-9-silabifluorene (10)  
<sup>29</sup>Si-NMR

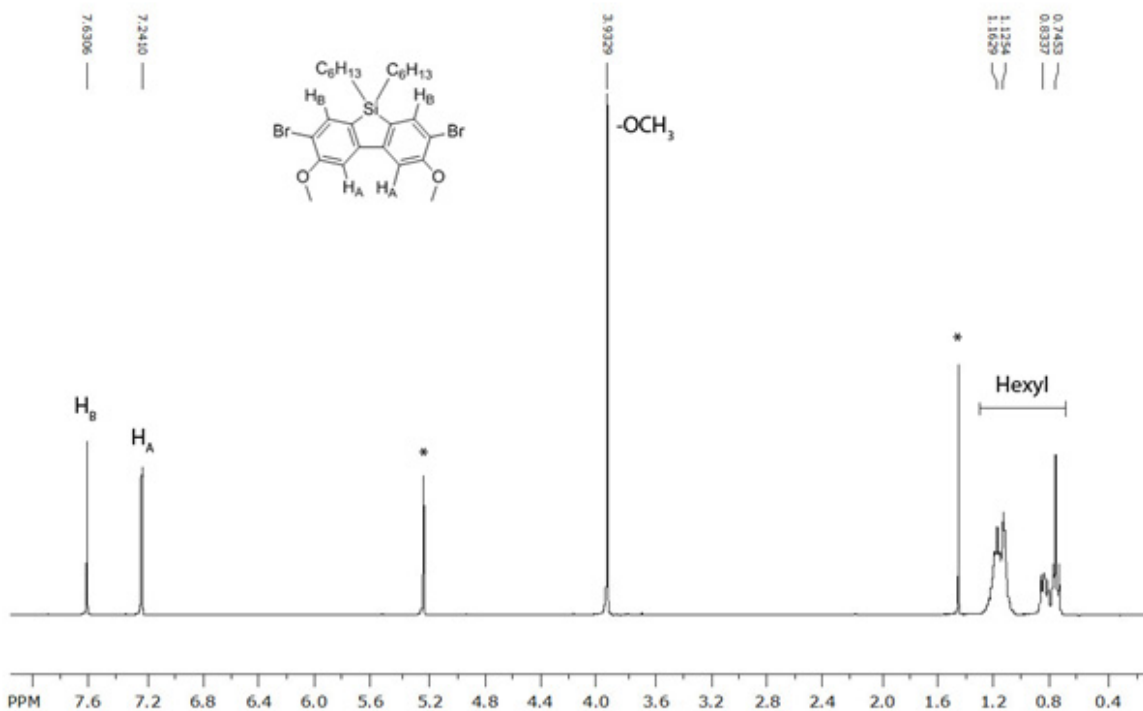

S1.8.0 – 2,7-dibromo-3,6-dimethoxy-9,9-dihexylsilabifluorene (11) <sup>1</sup>H-NMR

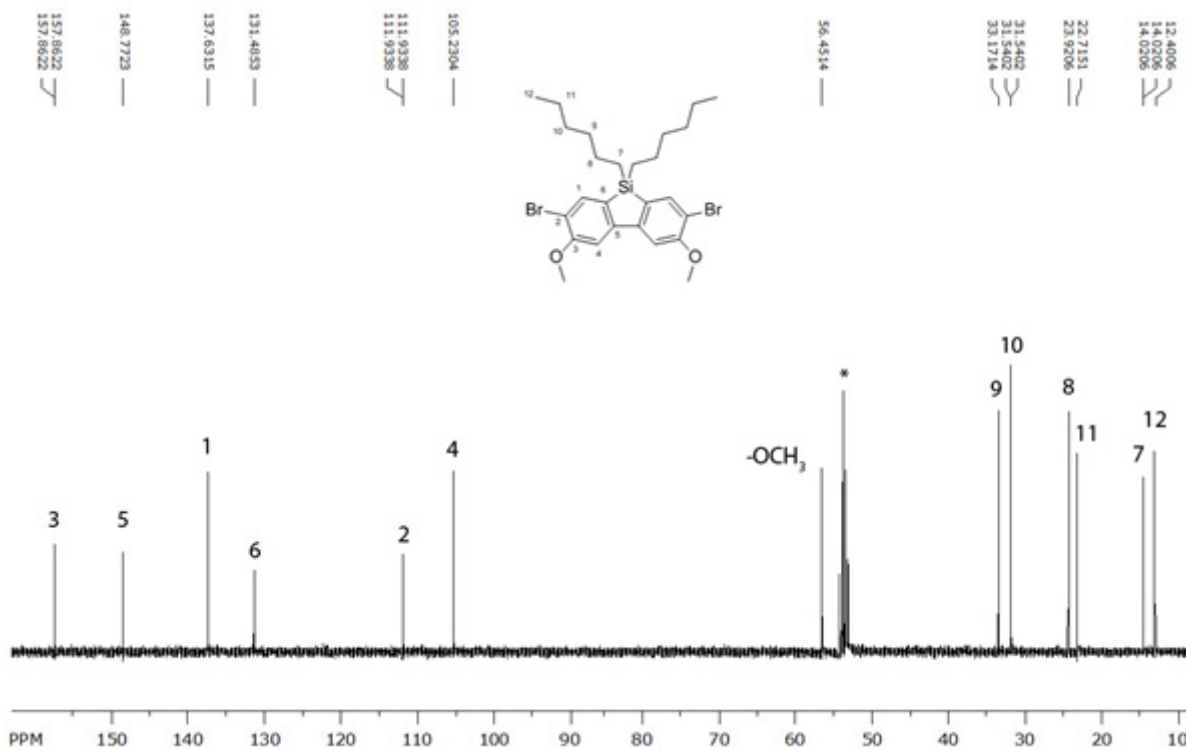

S1.8.1 – 2,7-dibromo-3,6-dimethoxy-9,9-dihexylsilabifluorene (11) <sup>13</sup>C-NMR

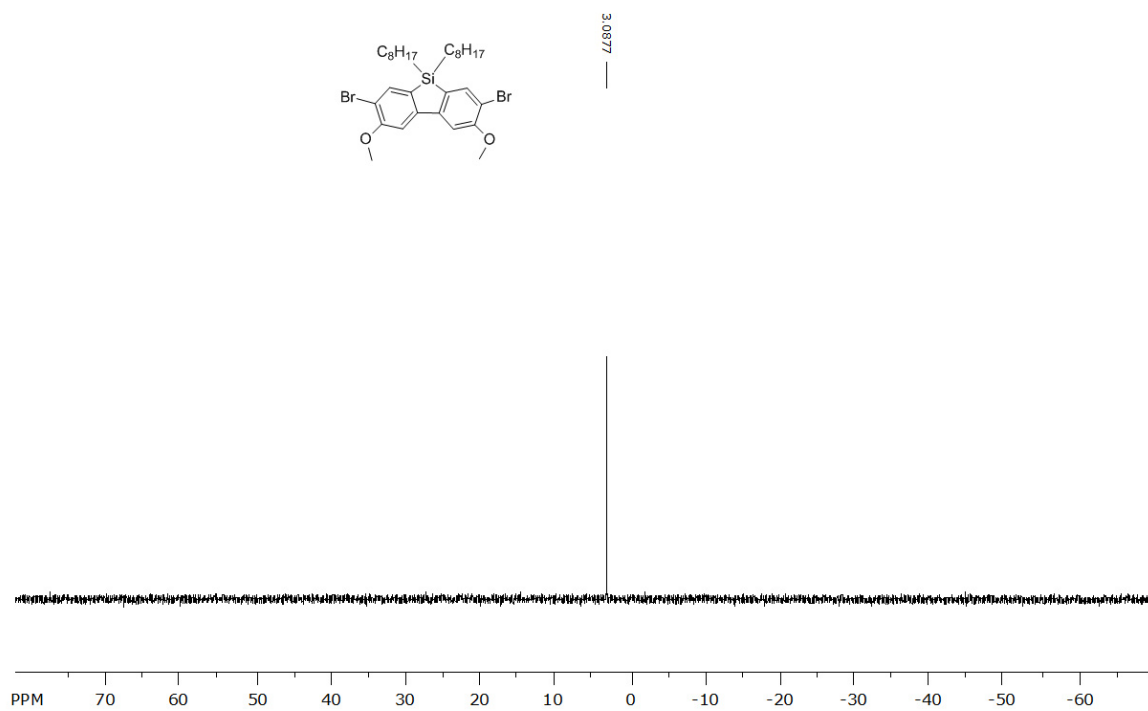

S1

### 1.8.2 – 2,7-dibromo-3,6-dimethoxy-9,9-dihexylsilabifluorene (11) $^{29}\text{Si}$ -NMR

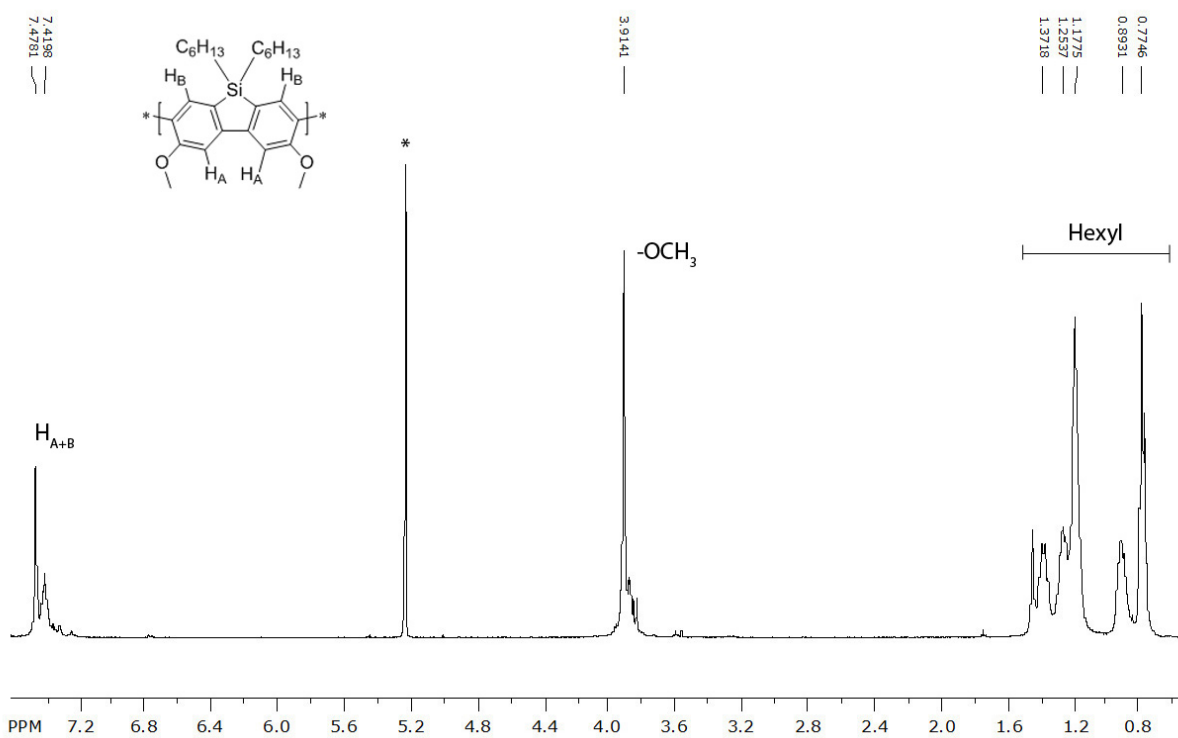

### S1.8.3 – Poly(3,6-dimethoxy-9,9'-dihexylsilafluorene) (PDHSF) $^1\text{H}$ -NMR

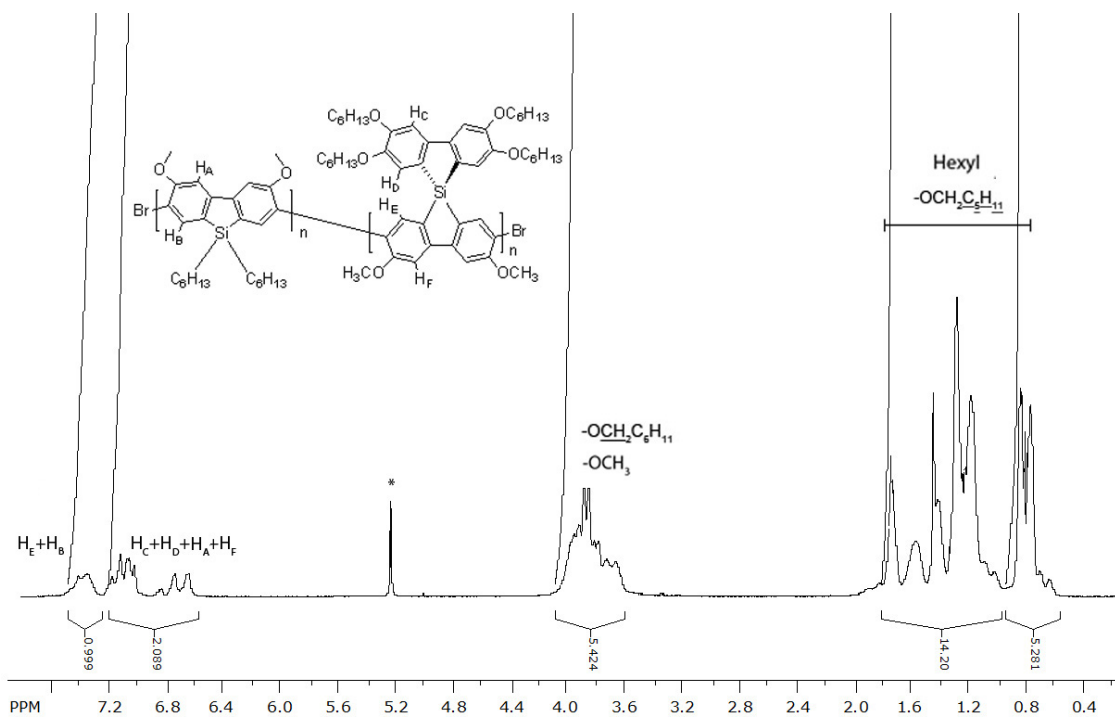

S1.9.0 – Poly(3,6-dimethoxy-9,9'-dihexylsilafluorene-co-3,6-dimethoxy-2',3',6',7'-tetrahexyloxy-9,9-spiro-9-silabifluorene) (PDHSF-co-PHSSF) (13)  $^1H$ -NMR

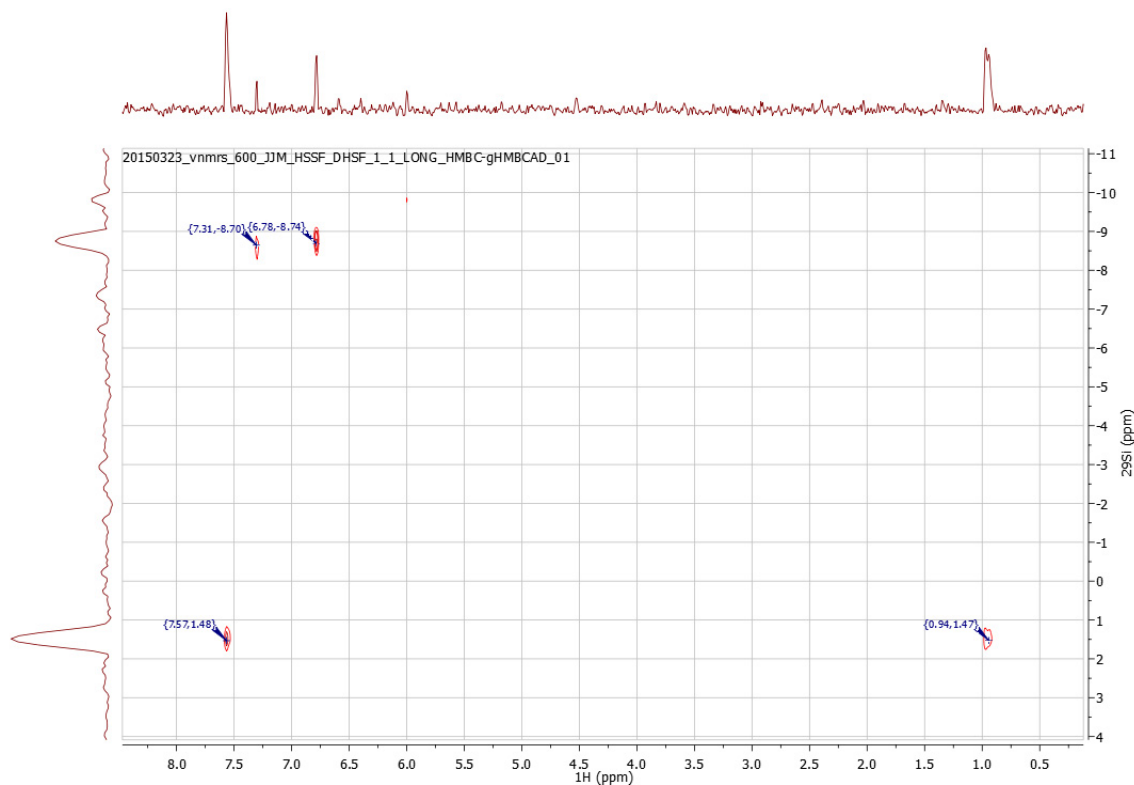

S1.9.1 – Poly(3,6-dimethoxy-9,9'-dihexylsilafluorene-co-3,6-dimethoxy-2',3',6',7'-tetrahexyloxy-9,9-spiro-9-silabifluorene) (PDHSF-co-PHSSF) (13)  $^{29}Si$  HMCB NMR

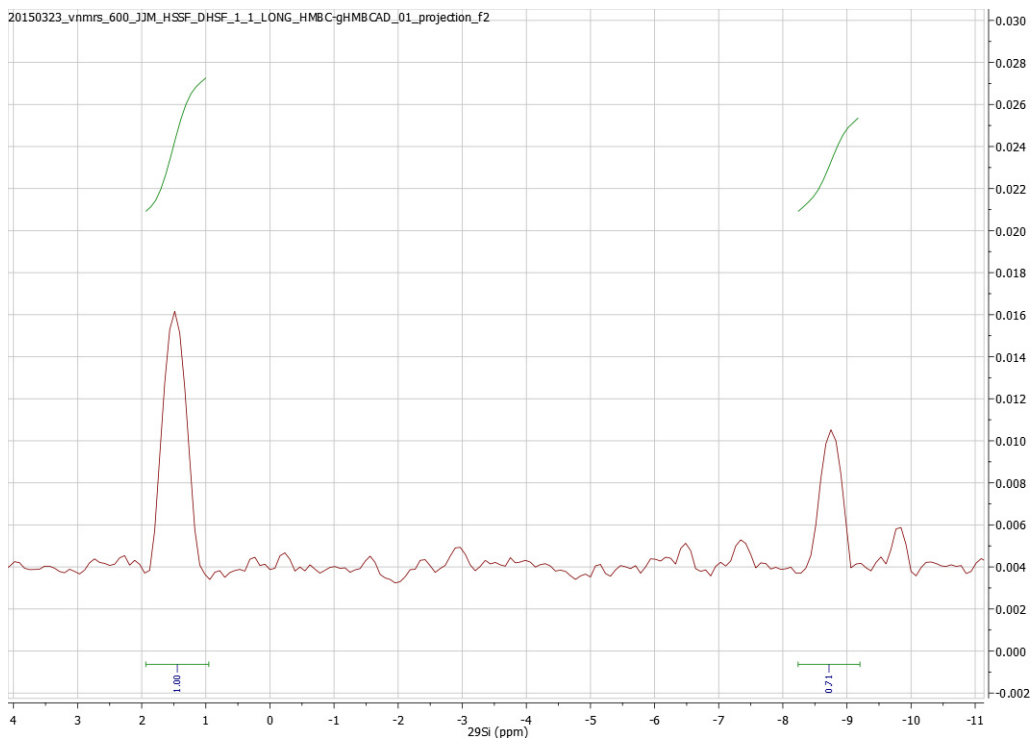

S1.9.2 – Poly(3,6-dimethoxy-9,9'-dihexylsilafluorene-co-3,6-dimethoxy-2',3',6',7'-tetrahexyloxy-9,9-spiro-9-silabifluorene) (PDHSF-co-PHSSF) (13) <sup>29</sup>Si Ratio

**Section 2:** GPC Data:

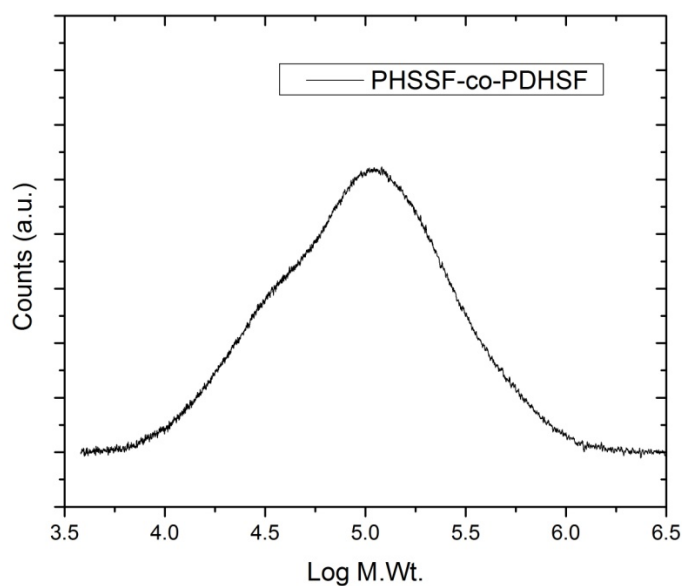

S2.1.0 – Poly(3,6-dimethoxy-9,9'-dihexylsilafluorene-co-3,6-dimethoxy-2',3',6',7'-tetrahexyloxy-9,9-spiro-9-silabifluorene) (PDHSF-co-PHSSF) (13)- GPC (THF Eluent, 35°C Column Temp., PS Standards):

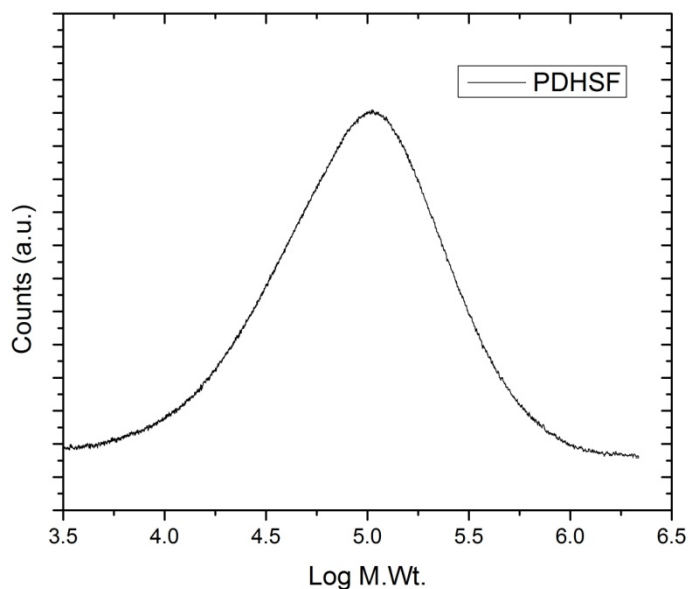

S2.2.0 – Poly(3,6-dimethoxy-9,9'-dihexylsilafluorene) (PDHSF)- GPC (THF Eluent, 35°C Column Temp., PS Standards):

### Section3: Electrochemistry

---

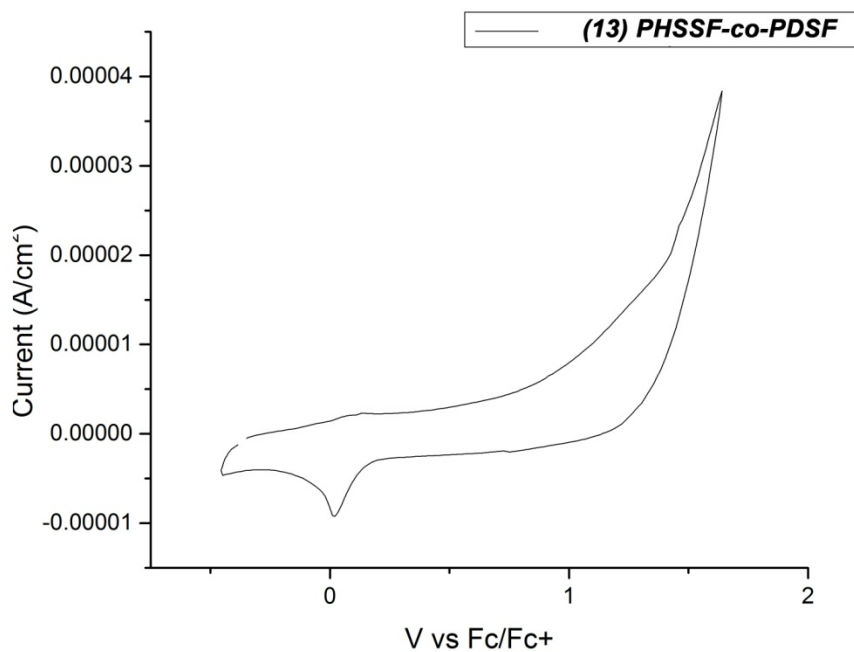

S3.1.0 – CV of Poly(3,6-dimethoxy-9,9'-dihexylsilafluorene-co-3,6-dimethoxy-2',3',6',7'-tetrahexyloxy-9,9-spiro-9-silabifluorene) (PDHSF-co-PHSSF) (13)

---
